# Supplementary material
Source: PubMed Central journal article supplement (PMC7849667)
Supplement: jcsm.8354.ds001.pdf [file jcsm.8354.ds001.pdf]

**Table S1.** Crude and adjusted odds ratios for prevalent systemic hypertension in models containing mild OSA groups as categorical variable (excluding subjects with pre-existing cardiovascular or cerebrovascular diseases, diabetes and hyperlipidaemia).

| <b>Model</b>                        | <b>Total<br/>N=2991</b> | <b>B</b> | <b>O.R. (95% C.I)</b> | <b>p-value</b> |
|-------------------------------------|-------------------------|----------|-----------------------|----------------|
| <b>Model 0</b>                      |                         |          |                       |                |
| Mild <sub>AHI 5-&lt;11/h</sub> OSA  | 2991                    | 0.679    | 1.972 (1.651-2.256)   | <0.001         |
| Mild <sub>AHI 11-&lt;15/h</sub> OSA | 2991                    | 0.973    | 2.645 (2.132-3.280)   | <0.001         |
| <b>Model 1</b>                      |                         |          |                       |                |
| Mild <sub>AHI 5-&lt;11/h</sub> OSA  | 2661                    | 0.460    | 1.584 (1.297-1.936)   | <0.001         |
| Mild <sub>AHI 11-&lt;15/h</sub> OSA | 2661                    | 0.646    | 1.907 (1.490-2.442)   | <0.001         |
| <b>Model 2</b>                      |                         |          |                       |                |
| Mild <sub>AHI 5-&lt;11/h</sub> OSA  | 2727                    | 0.470    | 1.670 (1.315-1.948)   | <0.001         |
| Mild <sub>AHI 11-&lt;15/h</sub> OSA | 2727                    | 0.629    | 1.877 (1.476-2.387)   | <0.001         |

Data are presented as OR (95% CI) unless otherwise stated. Model 0: unadjusted; model 1: full model included the covariates age, sex, body mass index, waist/hip ratio, neck circumference, chronic obstructive pulmonary disease, smoking status, Epworth Sleepiness Scale (ESS) score, type of sleep study; model 2: parsimonious model excluded from the full model the covariates gender, smoking, COPD and ESS score.

**Table S2.** Crude and adjusted odds ratios for prevalent systemic hypertension in models containing mild OSA groups as categorical variable (excluding subjects with pre-existing cardiovascular or cerebrovascular diseases, diabetes and hyperlipidaemia) in PG group.

| <b>PG</b>                           | <b>Total<br/>N=2070</b> | <b>B</b> | <b>O.R. (95% C.I)</b> | <b>p-value</b> |
|-------------------------------------|-------------------------|----------|-----------------------|----------------|
| <b>Model 0</b>                      |                         |          |                       |                |
| Mild <sub>AHI 5-&lt;11/h</sub> OSA  | 2070                    | 0.838    | 2.306 (1.859-2.861)   | <0.001         |
| Mild <sub>AHI 11-&lt;15/h</sub> OSA | 2070                    | 1.019    | 2.770 (2.099-3.655)   | <0.001         |
| <b>Model 1</b>                      |                         |          |                       |                |
| Mild <sub>AHI 5-&lt;11/h</sub> OSA  | 1904                    | 0.482    | 1.620 (1.177-2.230)   | 0.003          |
| Mild <sub>AHI 11-&lt;15/h</sub> OSA | 1904                    | 0.577    | 1.780 (1.400-2.265)   | <0.001         |
| <b>Model 2</b>                      |                         |          |                       |                |
| Mild <sub>AHI 5-&lt;11/h</sub> OSA  | 1905                    | 0.492    | 1.636 (1.191-2.247)   | 0.002          |
| Mild <sub>AHI 11-&lt;15/h</sub> OSA | 1905                    | 0.574    | 1.776 (1.399-2.255)   | <0.001         |

**Table S3.** Crude and adjusted odds ratios for prevalent systemic hypertension in models containing mild OSA groups as categorical variable (excluding subjects with pre-existing cardiovascular or cerebrovascular diseases, diabetes and hyperlipidaemia) in PSG group.

| PSG                                 | Total<br>N=920 | B      | O.R. (95% C.I)      | p-value |
|-------------------------------------|----------------|--------|---------------------|---------|
| <b>Model 0</b>                      |                |        |                     |         |
| Mild <sub>AHI 5-&lt;11/h</sub> OSA  | 920            | 0.275  | 1.316 (0.959-1.807) | 0.089   |
| Mild <sub>AHI 11-&lt;15/h</sub> OSA | 920            | 0.723  | 2.062 (1.451-2.928) | <0.001  |
| <b>Model 1</b>                      |                |        |                     |         |
| Mild <sub>AHI 5-&lt;11/h</sub> OSA  | 756            | -0.004 | 0.996 (0.683-1.452) | 0.983   |
| Mild <sub>AHI 11-&lt;15/h</sub> OSA | 756            | 0.552  | 1.737 (1.1422.643)  | 0.010   |
| <b>Model 2</b>                      |                |        |                     |         |
| Mild <sub>AHI 5-&lt;11/h</sub> OSA  | 757            | 0.010  | 1.010 (0.696-1.466) | 0.957   |
| Mild <sub>AHI 11-&lt;15/h</sub> OSA | 757            | 0.530  | 1.699 (1.124-2.568) | 0.012   |

Data are presented as OR (95% CI) unless otherwise stated. Model 0: unadjusted; model 1: full model included the covariates age, sex, body mass index, waist/hip ratio, neck circumference, chronic obstructive pulmonary disease, smoking status, Epworth Sleepiness Scale (ESS) score, type of sleep study; model 2: parsimonious model excluded from the full model the covariates gender, smoking, COPD and ESS score.

**Table S4. Polysomnography characteristics of the study population**

|                                                 | Total<br>population<br>N=1596 | Non-apnoeic<br>snorers<br>(AHI<5/h)<br>N=566 | Total population according to AHI                                              |                                                                                  | p-value<br>across<br>all |
|-------------------------------------------------|-------------------------------|----------------------------------------------|--------------------------------------------------------------------------------|----------------------------------------------------------------------------------|--------------------------|
|                                                 |                               |                                              | Mild <sub>AHI 5-&lt;11/h</sub><br>OSA Patients<br>(AHI 5 to<br><11/h)<br>N=615 | Mild <sub>AHI 11-&lt;15/h</sub><br>OSA Patients<br>(AHI 11 to<br>≤15/h)<br>N=415 |                          |
| TRT (min)                                       | 459 ± 57                      | 460 ± 58                                     | 461 ± 58                                                                       | 455 ± 54                                                                         | 0.271                    |
| TST (min)                                       | 366 ± 74                      | 362 ± 77                                     | 370 ± 73                                                                       | 367 ± 72                                                                         | 0.172                    |
| Sleep efficiency, %                             | 83 (74-91)                    | 83 (73-91)                                   | 84 (75-91)                                                                     | 83 (74-91)                                                                       | 0.512                    |
| N1 (%)                                          | 7 (3-13)                      | 7 (4-15)                                     | 7 (3-12)                                                                       | 6 (3-13) <sup>#</sup>                                                            | 0.017                    |
| N2 (%)                                          | 52 ± 16                       | 51 ± 16                                      | 51 ± 16                                                                        | 53 ± 16                                                                          | 0.186                    |
| N3 (%)                                          | 15 (8-25)                     | 15 (7-24)                                    | 15 (8-26)                                                                      | 14 (7-25)                                                                        | 0.366                    |
| REM(%)                                          | 16 ± 8                        | 16 ± 8                                       | 17 ± 8                                                                         | 16 ± 8                                                                           | 0.197                    |
| AHI                                             | 7 ± 3                         | 2 ± 1                                        | 8 ± 2 <sup>*</sup>                                                             | 13 ± 1 <sup>#,**</sup>                                                           | <0.001                   |
| Arousal Index (Total)<br>(data on 685 patients) | 17 (10-25)                    | 14 (8-20)                                    | 15 (12-25) <sup>*</sup>                                                        | 19 (10-29) <sup>#</sup>                                                          | <0.001                   |
| PLM AI                                          | 2 (0-7)                       | 2 (0-6)                                      | 3 (0-9) <sup>*</sup>                                                           | 1 (0-7)                                                                          | 0.029                    |
| Respiratory AI                                  | 3 (1-8)                       | 1 (0-3)                                      | 4 (2-8) <sup>*</sup>                                                           | 7 (3-13) <sup>#,**</sup>                                                         | <0.001                   |
| Spontaneous AI                                  | 8 (4-14)                      | 9 (4-15)                                     | 8 (4-14)                                                                       | 7 (4-13)                                                                         | 0.125                    |
| ODI                                             | 4 (2-8)                       | 1 (1-3)                                      | 5 (2-8) <sup>*</sup>                                                           | 9 (5-13) <sup>#,**</sup>                                                         | <0.001                   |
| Mean SpO <sub>2</sub>                           | 95 (93-96)                    | 95 (94-96)                                   | 95 (93-96) <sup>*</sup>                                                        | 95 (93-95) <sup>#</sup>                                                          | <0.001                   |
| Lowest SpO <sub>2</sub>                         | 88 (84-91)                    | 90 (87-92)                                   | 87 (83-90) <sup>*</sup>                                                        | 86 (81-89) <sup>#,**</sup>                                                       | <0.001                   |

Data are presented as mean values ± SD or median (25th-75th percentile), unless otherwise indicated. TRT=Total recording time, TST= Total sleep time, AHI = Apnoea-hypopnoea index, AI = Arousal index, PLM= Periodic Limb Movement, ODI = oxygen desaturation index,

<sup>#</sup>  $p < 0.05$  mild<sub>AHI 11-<15/h</sub> vs non-apnoeic snorers; <sup>\*</sup>  $p < 0.05$  mild<sub>AHI 5-<11/h</sub> vs non-apnoeic snorers;

<sup>\*\*</sup>  $p < 0.05$  and mild<sub>AHI 11-<15/h</sub> vs mild<sub>AHI 5-<11/h</sub> OSA patients.
